# Supplementary material for: Adaptable Functionality of Transcriptional Feedback in Bacterial Two-Component Systems
Source: PLOS journal article supplement (doi:10.1371/journal.pcbi.1000676), 2010-02-11
Supplement: S8 (10.1371/journal.pcbi.1000676.s008) [file journal.pcbi.1000676.s008]

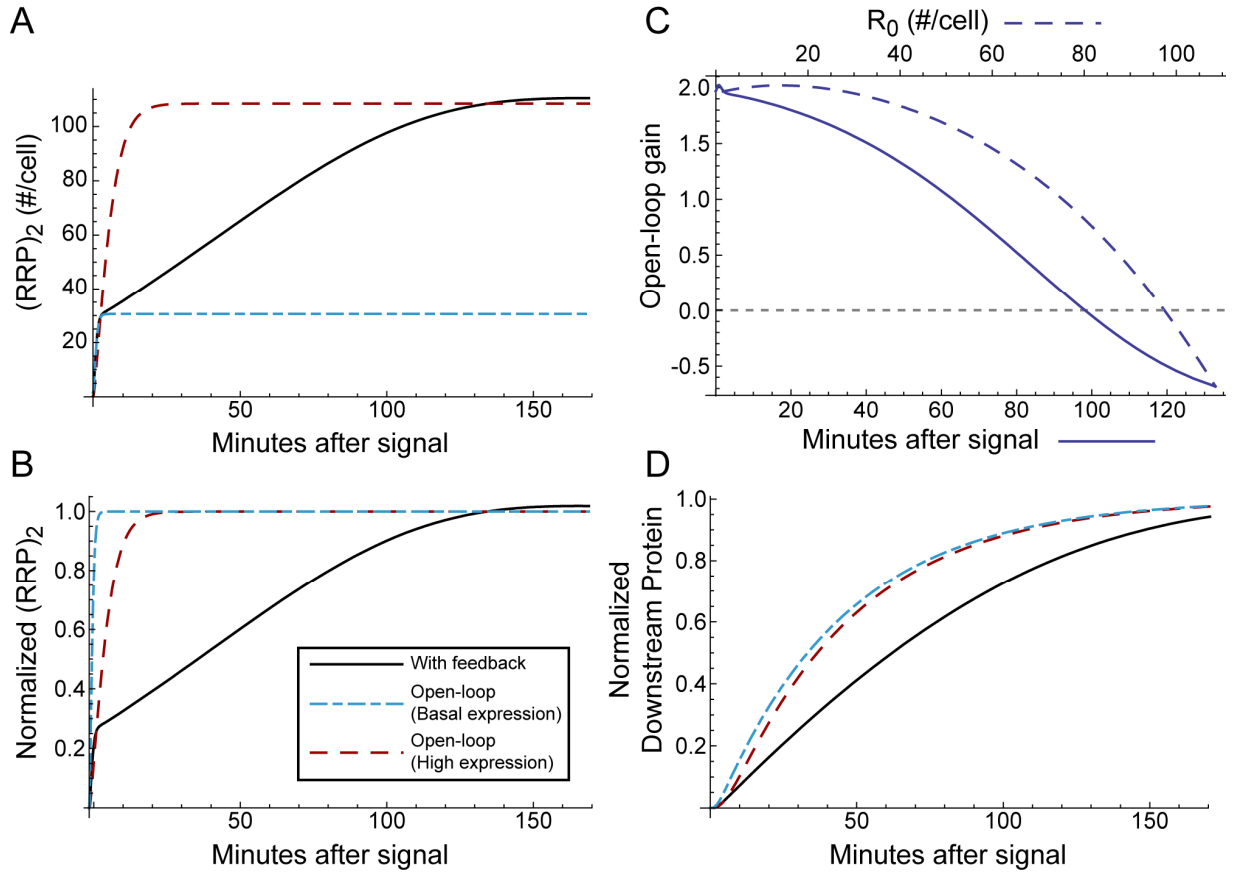

**Figure S4.** Two-component system kinetics with non-steady state open loop gain that switches between positive and negative. A-B. Induction of transcriptionally active response regulator dimer  $(RRP)_2$  in a case with negative steady state open loop gain and open loop dynamics with basal ( $R_0 = (RRP)_2 |_{k_{ph}=10}$ ) or high expression ( $R_0 = (RRP)_2 |_{k_{ph}=0.1}$ ). C. Non-steady state open loop gain switches between positive and negative over time. D. Downstream protein induction is slowed by feedback in this case. Parameters:  $k_{ap}=0.185045$ ,  $k_{ad}=5.16274$ ,  $k_{pi}=3.04614$ ,  $k_{ip}=2.3304$ ,  $k_b=4.06472$ ,  $k_d=0.0528448$ ,  $k_{bl}=0.338406$ ,  $k_{dl}=0.04235$ ,  $k_{RRPdm}=0.962574$ ,  $k_{RRPmd}=1.43538$ ,  $k_{txn}=0.0000755422$ ,  $k_{SKtsn}=0.036068$ ,  $tsn\ mult=15.4986$ ,  $k_{txnbasal}=3.41719 \times 10^{-6}$ ,  $K_{mDS}=0.15259$ ,  $K_m=1.40665$ ,  $k_{mRNAdeg}=0.0115463$ ,  $k_{exp}=0.00995825$ ,  $K_{mexp}=0.216291$ ,  $k_{exd}=8.23057 \times 10^{-6}$ ,  $K_{mexd}=0.0282159$ .
