# Supplementary material for: Adaptable Functionality of Transcriptional Feedback in Bacterial Two-Component Systems
Source: PLOS journal article supplement (doi:10.1371/journal.pcbi.1000676), 2010-02-11
Supplement: S11 (10.1371/journal.pcbi.1000676.s011) [file journal.pcbi.1000676.s011]

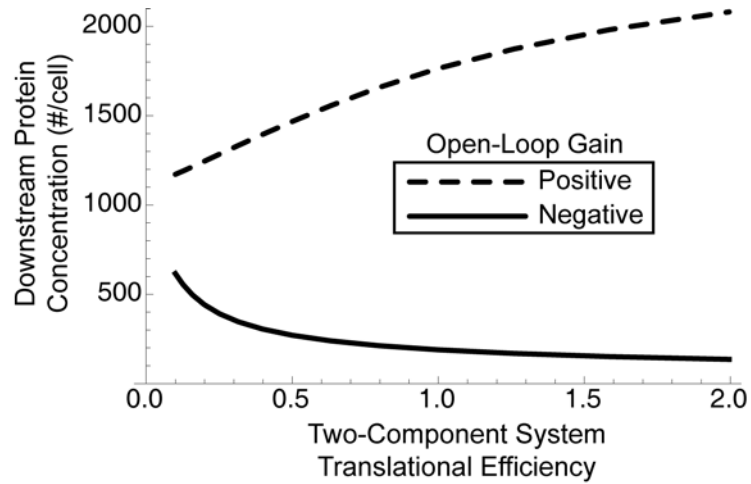

**Figure S7.** Predicted steady-state effects of perturbing translational efficiency. Rates of response regulator and sensor histidine kinase translation ( $k_{RRtsn}$ ,  $k_{SHKtsn}$ ) were changed by an efficiency multiplier using the reference parameter set at  $k_{ph} = 0.1$  (negative gain) and  $k_{ph} = 0.001$  (positive gain). A positively regulated downstream protein readout was taken one hour after signal.
